# Supplementary material
Source: publisher figshare collection journal article supplement (https://acs.figshare.com/ndownloader/files/4172704)
Supplement: Supplementary file 1 [file 4172704]

## Supporting Information

- Supplemental Figure S1. A transmembrane helix was sufficient for ER processing in 3T3 and Hela cells. Related to Figure 1 but in different cell lines to show results are not cell line specific.
- Supplemental Figure S2. Fusion proteins behaved similarly in 3T3 cells. Related to Figure 2-4 but in different cell lines to show results are not cell line specific.
- Supplemental Figure S3. Fusion proteins behaved similarly in Hela cells. Related to Figure 2-4 but in different cell lines to show results are not cell line specific.
- Supplemental Table 1. Co-localization coefficients for fusion proteins in 3T3 cells. Related to Figure S2.
- Supplemental Table 2. Co-localization coefficients for fusion proteins in Hela cells. Related to Figure S3.
- Supplemental Video S1. Vesicles from Venus-TMTR4-mRFP were moving. Related to Figure 1 to show the fluorescence specks are vesicles.
- Supplemental Video S2. Rapamycin induced translocation of FRB-Ceru to FKBP12-TMTR4-Venus-mRFP was observed in Cos-7 cells. Related to Figure 2 to show the dynamic recruitment of FRB-Ceru to establish protein orientation.
- Supplemental Video S3. Rapamycin induced translocation of FRB-Ceru to FKBP12-TMTR4-Venus-KDEL was observed in Cos-7 cells. Related to Figure 3 to show the dynamic recruitment of FRB-Ceru to establish protein orientation.

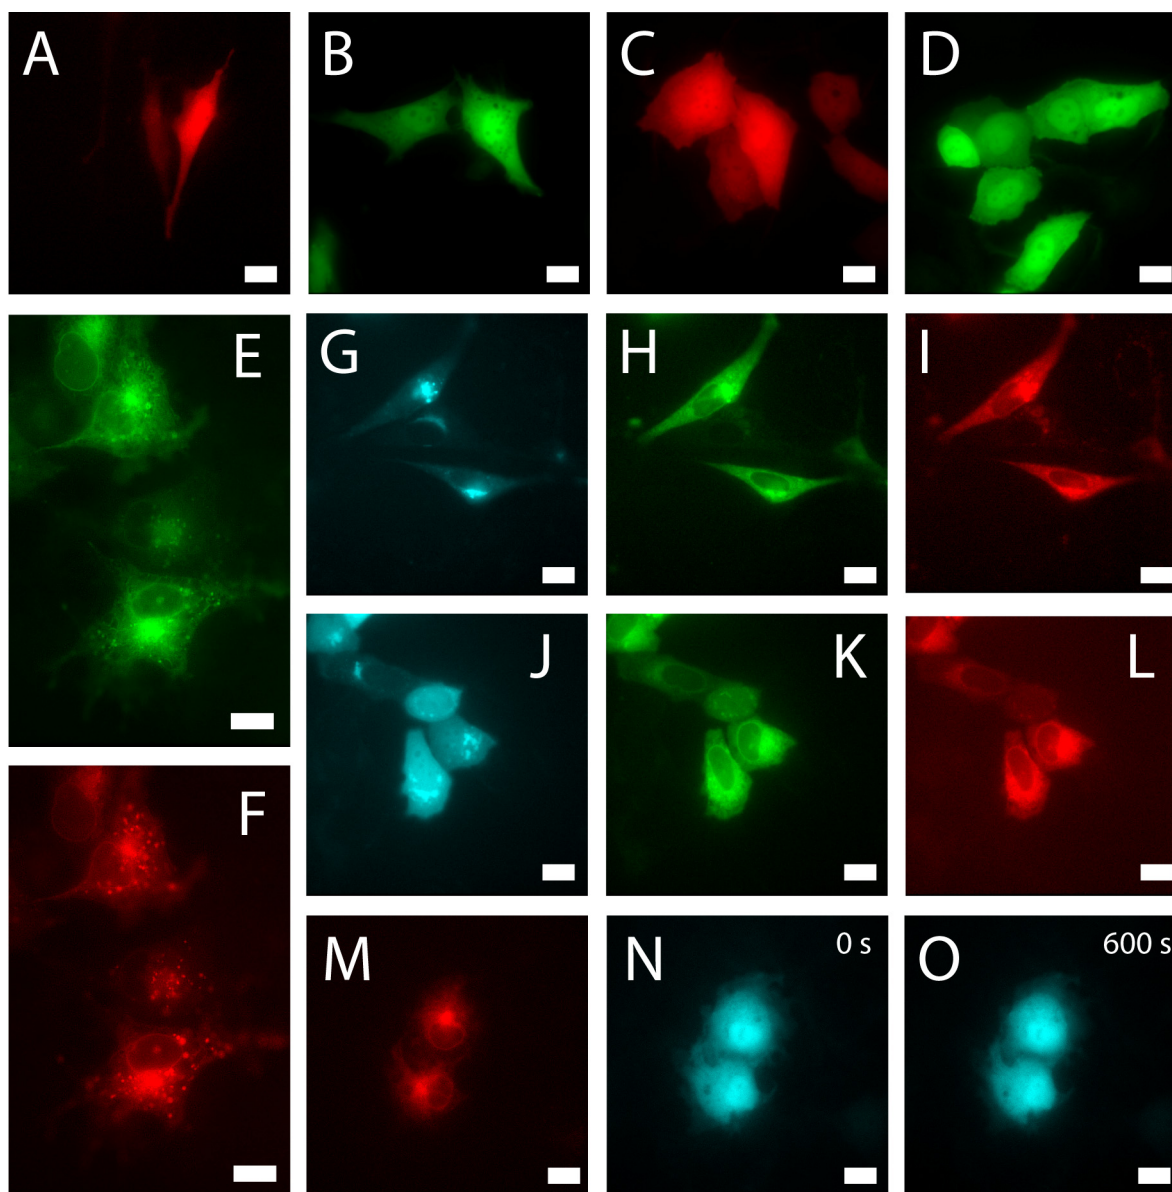

**Supplemental Figure S1. A transmembrane helix was sufficient for ER processing in 3T3 and HeLa cells**

(A, C) mRFP or (B, D) Venus expressing alone in 3T3 and HeLa cells, respectively, were nuclear and cytoplasmic. (E, F) The green and red channel, respectively, of Venus-TM<sub>PDGFR</sub>-mRFP expressing Cos-7 cells localized to regions resembling ER processing. (G-L) Arf1-CFP (cyan) and Venus-TM<sub>TLR4</sub>-mRFP (green and red) co-expressing in (G-I) 3T3 and (J-L) HeLa cells showed strong Venus-TM<sub>TLR4</sub>-mRFP fluorescence to regions of the golgi apparatus. Scale bar is 10  $\mu$ m. Images are false color: CFP, cyan; Venus, green; mRFP, red. (M) FKBP12-TM<sub>TLR4</sub>-mRFP and (N) FRB-Ceru were co-expressed in Cos-7 cells. (O) Rapamycin failed to induce the translocation of FRB-Ceru to FKBP12-TM<sub>TLR4</sub>-mRFP.

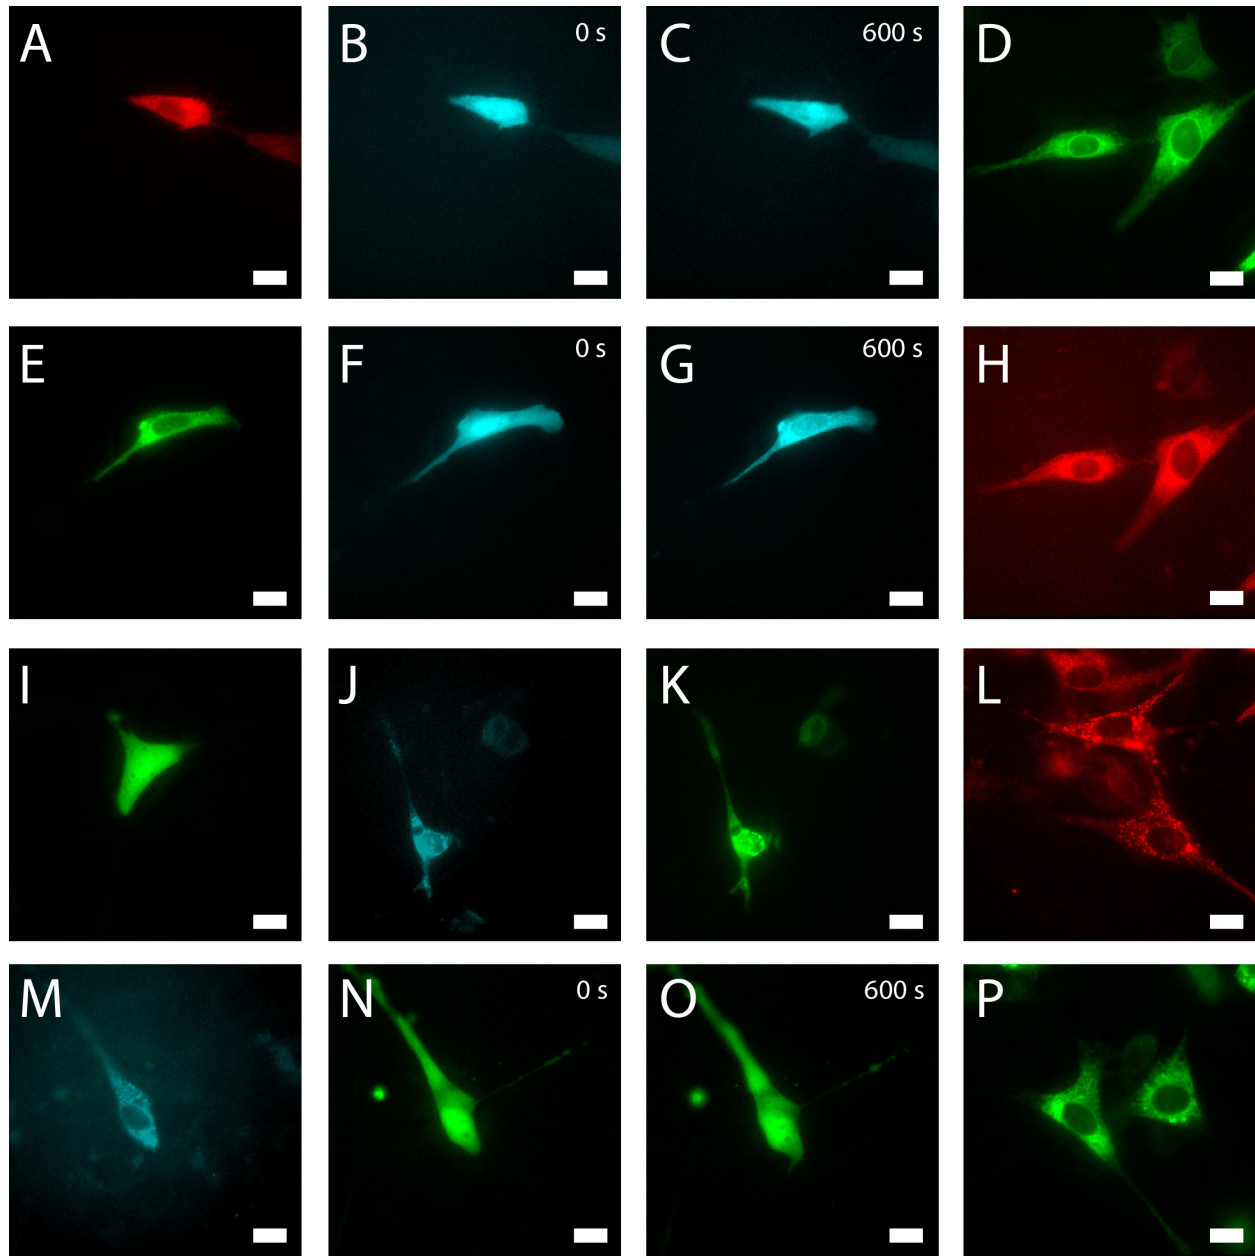

**Supplemental Figure S2. Fusion proteins behaved similarly in 3T3 cells**

(A) FKBP12-TM<sub>TLR4</sub>-mRFP and (B) FRB-Ceru were co-expressed in 3T3 cells. (C) Rapamycin induced translocation of FRB-Ceru to FKBP12-TM<sub>TLR4</sub>-mRFP. (D) FKBP12-TM<sub>TLR4</sub>-Venus-KDEL and (H) STIM1-mRFP co-expressing in 3T3 cells showed co-localization at the ER. Similarly, (E) FKBP12-TM<sub>TLR4</sub>-Venus-KDEL and (F) FRB-Ceru were co-expressed in 3T3 cells. (G) Rapamycin induced translocation of FRB-Ceru to FKBP12-TM<sub>TLR4</sub>-Venus-KDEL. (L) TM<sub>TLR4</sub>-mRFP expressing in 3T3 cells labeled vesicles, while (P) TM<sub>TLR4</sub>-Venus-KDEL labeled the ER. (I) *NpuDnaE<sub>C</sub>*-Venus expressing in 3T3 cells was cytoplasmic and nuclear. (J) TM<sub>TLR4</sub>-FKBP12-TM<sub>TLR4</sub>-Ceru-*NpuDnaE<sub>N</sub>* and (K) *NpuDnaE<sub>C</sub>*-Venus co-expressing in 3T3 cells showed co-localization. (M) TM<sub>TLR4</sub>-FKBP12-TM<sub>TLR4</sub>-Ceru-*NpuDnaE<sub>N</sub>* and (N) FRB-Venus were co-expressed in 3T3 cells. (O) Rapamycin failed to induce the translocation of FRB-Venus to FKBP12-TM<sub>TLR4</sub>-Venus-KDEL. Scale bar is 10  $\mu$ m. Images are false color: CFP, cyan; Venus, green; mRFP, red.

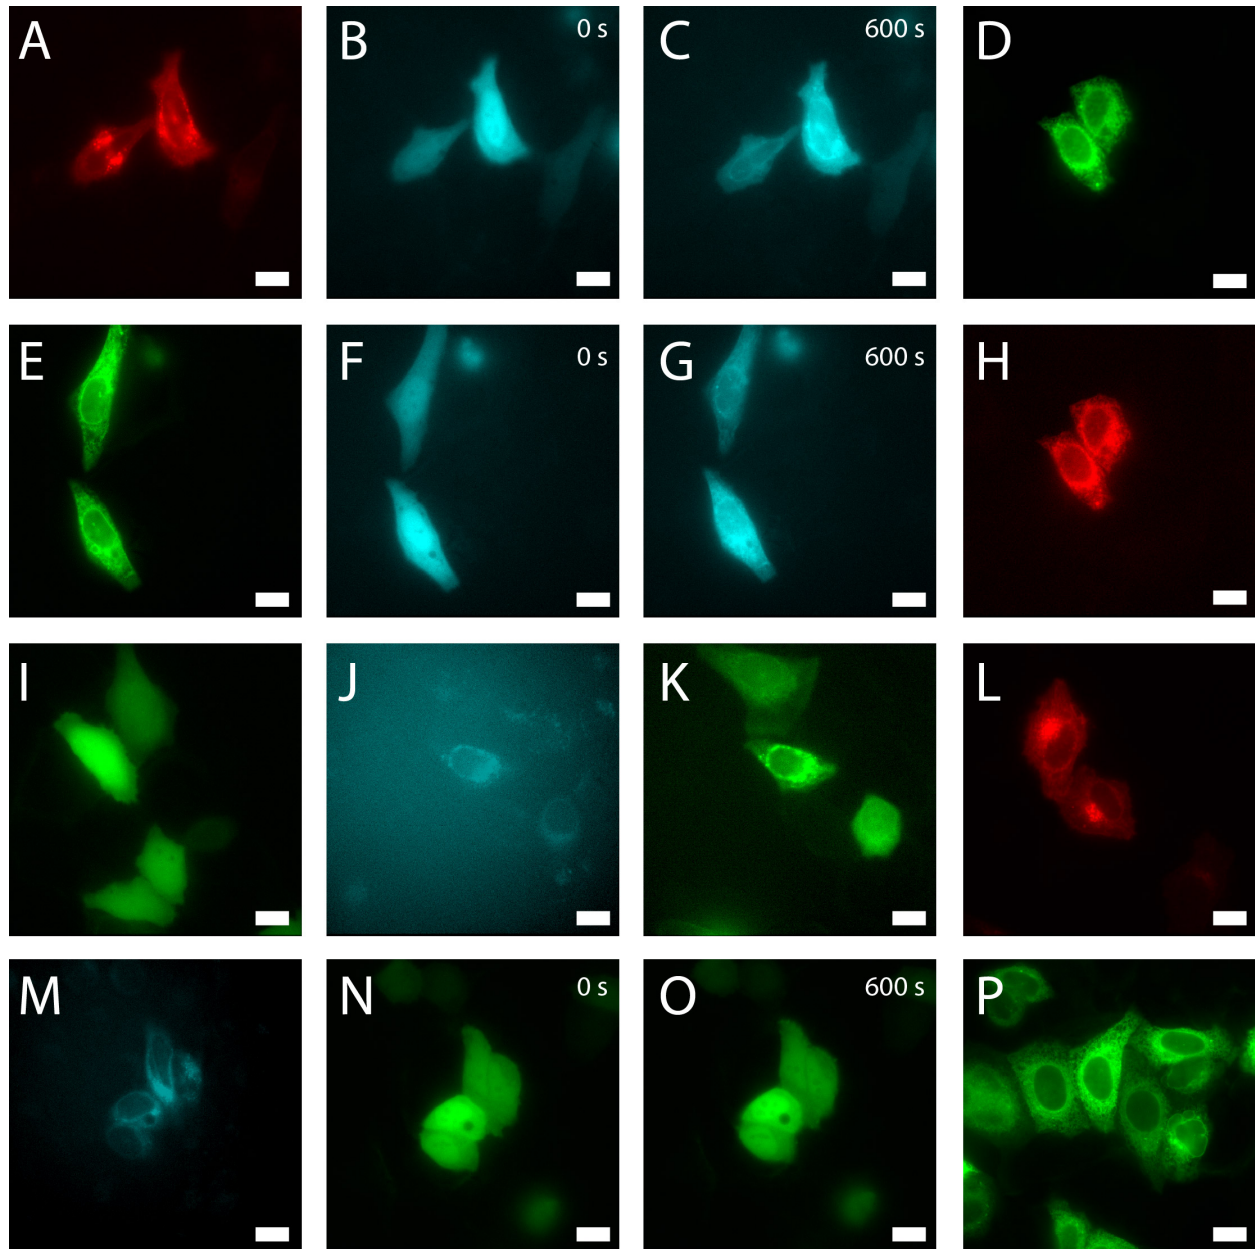

**Supplemental Figure S3. Fusion proteins behaved similarly in HeLa cells**

(A) FKBP12-TM<sub>TLR4</sub>-mRFP and (B) FRB-Ceru were co-expressed in HeLa cells. (C) Rapamycin induced translocation of FRB-Ceru to FKBP12-TM<sub>TLR4</sub>-mRFP. (D) FKBP12-TM<sub>TLR4</sub>-Venus-KDEL and (H) STIM1-mRFP co-expressing in HeLa cells showed co-localization at the ER. Similarly, (E) FKBP12-TM<sub>TLR4</sub>-Venus-KDEL and (F) FRB-Ceru were co-expressed in HeLa cells. (G) Rapamycin induced translocation of FRB-Ceru to FKBP12-TM<sub>TLR4</sub>-Venus-KDEL. (L) TM<sub>TLR4</sub>-mRFP expressing in HeLa cells labeled vesicles, while (P) TM<sub>TLR4</sub>-Venus-KDEL labeled the ER. (I) *NpuDnaE<sub>C</sub>*-Venus expressing in HeLa cells was cytoplasmic and nuclear. (J) TM<sub>TLR4</sub>-FKBP12-TM<sub>TLR4</sub>-Ceru-*NpuDnaE<sub>N</sub>* and (K) *NpuDnaE<sub>C</sub>*-Venus co-expressing in HeLa cells showed co-localization. (M) TM<sub>TLR4</sub>-FKBP12-TM<sub>TLR4</sub>-Ceru-*NpuDnaE<sub>N</sub>* and (N) FRB-Venus were co-expressed in HeLa cells. (O) Rapamycin failed to induce the translocation of FRB-Venus to FKBP12-TM<sub>TLR4</sub>-Venus-KDEL. Scale bar is 10 μm. Images are false color: CFP, cyan; Venus, green; mRFP, red.



**Table S1. Co-localization coefficients for fusion proteins in 3T3 cells.**

PCs, PCs with Costes' automatic thresholding and Van Steensel's peak CCF values for the co-localization of fusion proteins are reported for the below conditions. Percentage change is reported relative to resting conditions.

|                                                                                                                          | <i>PC</i> | <i>PC with<br/>Costes'<br/>Thresholding</i> | <i>Van<br/>Steensel's<br/>Peak CCF<sup>1</sup></i> | <i>PC<br/>(% Change)</i> | <i>PC with<br/>Costes'<br/>(% Change)</i> | <i>Van Steensel's<br/>Peak CCF<br/>(% Change)</i> |
|--------------------------------------------------------------------------------------------------------------------------|-----------|---------------------------------------------|----------------------------------------------------|--------------------------|-------------------------------------------|---------------------------------------------------|
| mRFP-TM <sub>TLR4</sub> -FKBP12 and<br>FRB-Ceru (resting)                                                                | 0.804     | 0.820                                       | 0.835                                              |                          |                                           |                                                   |
| mRFP-TM <sub>TLR4</sub> -FKBP12 and<br>FRB-Ceru (rapamycin)                                                              | 0.877     | 0.893                                       | 0.889                                              | 9.1                      | 8.9                                       | 6.5                                               |
| FKBP12-TM <sub>TLR4</sub> -Venus-KDEL<br>and FRB-Ceru (resting)                                                          | 0.824     | 0.824                                       | 0.830                                              |                          |                                           |                                                   |
| FKBP12-TM <sub>TLR4</sub> -Venus-KDEL<br>and FRB-Ceru (rapamycin)                                                        | 0.906     | 0.908                                       | 0.909                                              | 10.0                     | 10.1                                      | 9.5                                               |
| TM <sub>TLR4</sub> -FKBP12-TM <sub>TLR4</sub> -Ceru-<br><i>NpuDnaE<sub>N</sub></i> and <i>NpuDnaE<sub>C</sub></i> -Venus | 0.873     | 0.889                                       | 0.875                                              |                          |                                           |                                                   |
| TM <sub>TLR4</sub> -FKBP12-TM <sub>TLR4</sub> -Ceru-<br><i>NpuDnaE<sub>N</sub></i> and FRB-Venus<br>(resting)            | 0.703     | 0.725                                       | 0.704                                              |                          |                                           |                                                   |
| TM <sub>TLR4</sub> -FKBP12-TM <sub>TLR4</sub> -Ceru-<br><i>NpuDnaE<sub>N</sub></i> and FRB-Venus<br>(rapamycin)          | 0.710     | 0.724                                       | 0.710                                              | 1.0                      | -0.1                                      | 0.9                                               |

<sup>1</sup> All CCF values were statistically significant with Van Steensel's  $R^2$  values greater than 0.95. (28)

**Table S2. Co-localization coefficients for fusion proteins in Hela cells.**

PCs, PCs with Costes' automatic thresholding and Van Steensel's peak CCF values for the co-localization of fusion proteins are reported for the below conditions. Percentage change is reported relative to resting conditions.

|                                                                                                                          | <i>PC</i> | <i>PC with<br/>Costes'<br/>Thresholding</i> | <i>Van<br/>Steensel's<br/>Peak CCF<sup>1</sup></i> | <i>PC<br/>(% Change)</i> | <i>PC with<br/>Costes'<br/>(% Change)</i> | <i>Van Steensel's<br/>Peak CCF<br/>(% Change)</i> |
|--------------------------------------------------------------------------------------------------------------------------|-----------|---------------------------------------------|----------------------------------------------------|--------------------------|-------------------------------------------|---------------------------------------------------|
| mRFP-TM <sub>TLR4</sub> -FKBP12 and<br>FRB-Ceru (resting)                                                                | 0.795     | 0.795                                       | 0.801                                              |                          |                                           |                                                   |
| mRFP-TM <sub>TLR4</sub> -FKBP12 and<br>FRB-Ceru (rapamycin)                                                              | 0.855     | 0.855                                       | 0.855                                              | 7.5                      | 7.5                                       | 6.7                                               |
| FKBP12-TM <sub>TLR4</sub> -Venus-KDEL<br>and FRB-Ceru (resting)                                                          | 0.789     | 0.791                                       | 0.791                                              |                          |                                           |                                                   |
| FKBP12-TM <sub>TLR4</sub> -Venus-KDEL<br>and FRB-Ceru (rapamycin)                                                        | 0.845     | 0.845                                       | 0.845                                              | 7.1                      | 6.8                                       | 6.8                                               |
| TM <sub>TLR4</sub> -FKBP12-TM <sub>TLR4</sub> -Ceru-<br><i>NpuDnaE<sub>N</sub></i> and <i>NpuDnaE<sub>C</sub></i> -Venus | 0.844     | 0.855                                       | 0.845                                              |                          |                                           |                                                   |
| TM <sub>TLR4</sub> -FKBP12-TM <sub>TLR4</sub> -Ceru-<br><i>NpuDnaE<sub>N</sub></i> and FRB-Venus<br>(resting)            | 0.671     | 0.707                                       | 0.675                                              |                          |                                           |                                                   |
| TM <sub>TLR4</sub> -FKBP12-TM <sub>TLR4</sub> -Ceru-<br><i>NpuDnaE<sub>N</sub></i> and FRB-Venus<br>(rapamycin)          | 0.680     | 0.712                                       | 0.683                                              | 1.3                      | 0.7                                       | 1.1                                               |

<sup>1</sup> All CCF values were statistically significant with Van Steensel's R<sup>2</sup> values greater than 0.95. (28)

**Supplemental Video S1. Vesicles from Venus-TM<sub>TLR4</sub>-mRFP were moving**

Venus-TM<sub>TLR4</sub>-mRFP expressing in Cos-7 cells was observed in the red channel. Each 1 s of video represents approximately 15 s of elapsed time. Images are false color.

**Supplemental Video S2. Rapamycin induced translocation of FRB-Ceru to FKBP12-TM<sub>TLR4</sub>-Venus-mRFP was observed in Cos-7 cells**

FRB-Ceru was localized in the nucleus and cytoplasm of Cos-7 cells at the start of the experiment. When rapamycin was added near the start of the video, FRB-Ceru translocated to FKBP12-TM<sub>TLR4</sub>-mRFP. Each 1 s of video represents approximately 75 s of elapsed time. Images are false color.

**Supplemental Video S3. Rapamycin induced translocation of FRB-Ceru to FKBP12-TM<sub>TLR4</sub>-Venus-KDEL was observed in Cos-7 cells**

FRB-Ceru was localized in the nucleus and cytoplasm of Cos-7 cells at the start of the experiment. When rapamycin was added near the start of the video, FRB-Ceru translocated to FKBP12-TM<sub>TLR4</sub>-Venus-KDEL. Each 1 s of video represents approximately 75 s of elapsed time. Images are false color.
